# Supplementary material
Source: publisher figshare collection journal article supplement (https://acs.figshare.com/ndownloader/files/5887440)
Supplement: Supplementary file 1 [file 5887440]

Supporting Information

**Graft copolymerization of glycidyl methacrylate and ethylene glycol dimethacrylate on alumina for the removal of nitrogen and sulfur compounds from gas oil**

*Ali Abedi<sup>1</sup>, Jackson M. Chitanda<sup>1</sup>, Ajay K. Dalai<sup>1\*</sup>, and John Adjaye<sup>2</sup>*

<sup>1</sup> Department of Chemical and Biological Engineering, University of Saskatchewan, Saskatoon, Saskatchewan, Canada.

<sup>2</sup> Syncrude Edmonton Research Centre, Edmonton, Alberta, Canada T6N 1H4.

\*Corresponding author at: Department of Chemical and Biological Engineering, 57 Campus Drive, University of Saskatchewan, Saskatoon, SK, Canada S7N 5A9.

Tel: +1 (306) 966-4771; fax: +1 (306) 966-4777.

Email: [ajay.dalai@usask.ca](mailto:ajay.dalai@usask.ca)

## List of Contents

Figure S1: FT-IR spectra of PGMA-DAP-TENF

Figure S2: TGA/DTA thermogram of PGMA-DAP-TENF polymer

Table S1: Elemental CHNOS analysis of PGMA-DAP-TENF polymer at various stages

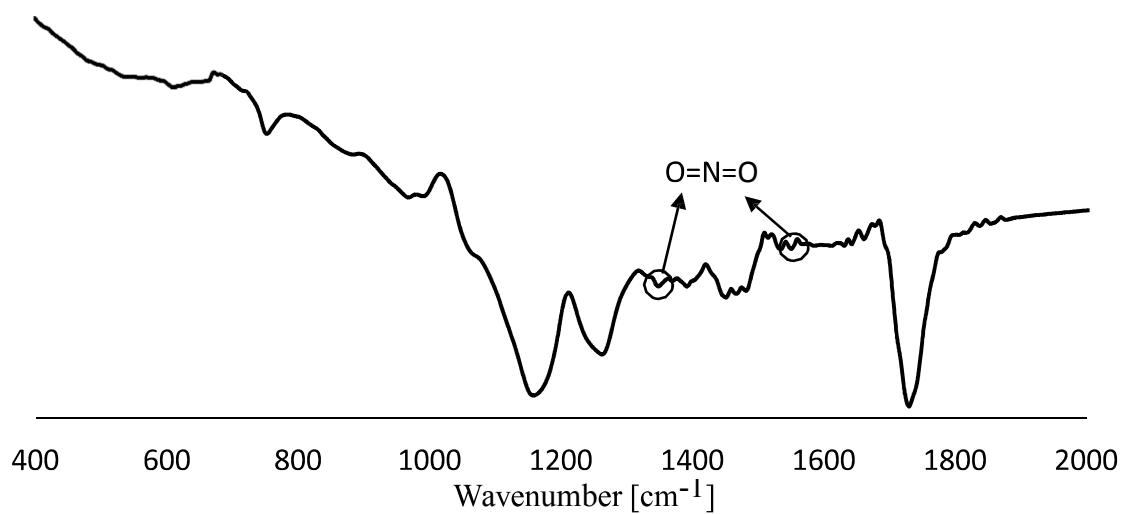

Figure S1: FT-IR spectra of PGMA-DAP-TENF.

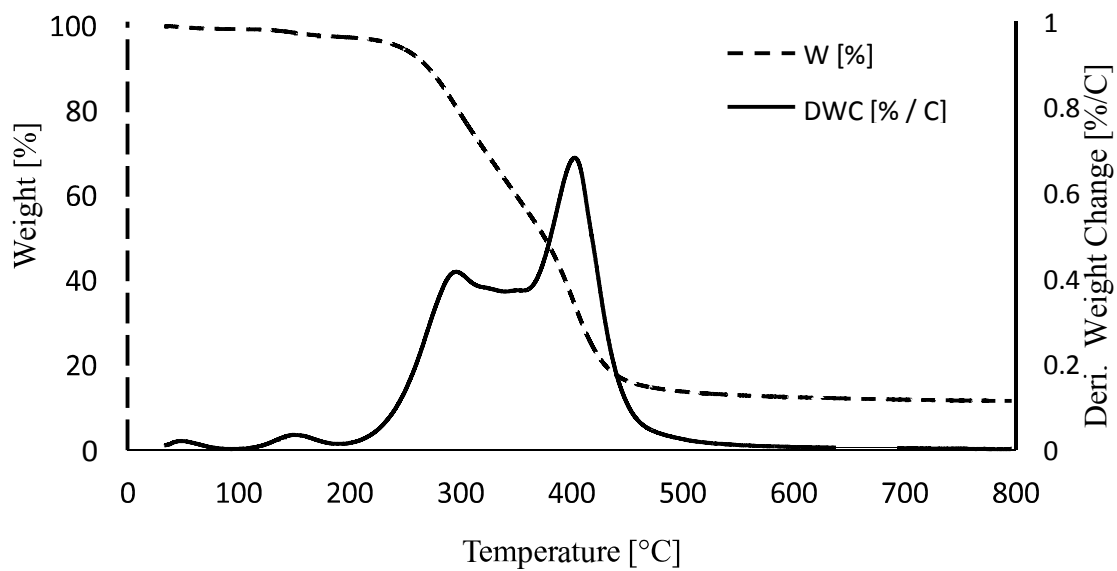

Figure S2: TGA/DTA thermogram of PGMA-DAP-TENF polymer.

Table S1: Elemental CHNOS analysis of PGMA-DAP-TENF polymer at various stages

| Sample/Element | Carbon<br>[wt. %] | Hydrogen<br>[wt. %] | Nitrogen<br>[wt. %] | Oxygen*<br>[wt. %] | Sulfur<br>[wt. %] |
|----------------|-------------------|---------------------|---------------------|--------------------|-------------------|
| PGMA-co-EDGMA  | 59.6              | 7.1                 | 0.0                 | 32.8               | 0.0               |
| Al-PGMA-DAP    | 56.9              | 8.0                 | 4.8                 | 30.4               | 0.0               |
| PGMA-DAP-TENF  | 56.1              | 7.8                 | 5.1                 | 30.8               | 0.0               |

\* Calculated by difference
